# Supplementary material for: Exploring virtual delivery of academic detailing to general practitioners compared with in-person delivery: a qualitative study
Source: PubMed Central journal article supplement — BMJ Open Qual. 2024 Oct 18;13(4):e002444. doi: 10.1136/bmjoq-2023-002444 (PMC11492952; doi:10.1136/bmjoq-2023-002444), 2024-10-18
Supplement: bmjoq-13-4-s001.pdf [file bmjoq-13-4-s001.pdf]

# Supplementary 1

## Interview guides (translated from Norwegian)

---

### Interview Guide 1 – the "Experienced" AD participants

#### Welcome and information section.

- Introduction to the project
- Information about how the interviews will be performed
- Information about Audio recording
- Information about de-identification of personal-identifying information (what you say here will be transcribed and de-identified so that it is not clear who said what. Audio files will be deleted after our analysis)
- The interviewers' confidentiality commitment to the AD deliverers
- Introduction of the interviewers
- The role of the moderator

#### Collecting participant consent on audio recording

➔ START AUDIO RECORDING

Question: Can you please state your name and confirm your consent to participate in the study as we have described?

➔ END AUDIO RECORDING (this is saved separately from the transcriptions)

➔ START AUDIO RECORDING AGAIN

#### Opening question

First, we would like to know how many years of experience you have as a general practitioner. Thank you.

#### Questions with regards to the virtual AD meeting/delivery

**NB! Questions not necessarily in the numbered order, this is just for easier reference.**

We understand that you have participated in AD meetings both in-person (physical) and virtually. We are primarily interested in your experience and perceptions of the virtual meetings compared to the physical meeting. However, we also aim to understand how AD can be improved in general.

1. What motivated you to participate in the virtual AD meeting?

Prompting questions:

- a) The first time you were invited
- b) Interesting topic
- c) Convenient timing

2. We are interested in understanding how you experienced this and any suggestions you have for improvement, but first: What were your expectations for the virtual AD meeting?

3. Can you tell us about how the meeting was planned and how it worked?

Prompting questions

- a) Was there anything that didn't work as you had hoped? Why?
- b) Was there anything you missed when it was conducted virtually?
- c) Do you prefer AD meetings during working hours or outside of working hours?
- d) Is there a difference when it's physical vs. virtual?
- e) How would you prefer to be invited to an AD meeting or to register for one?

4. What do you think is the main difference when AD is organized virtually vs. physically?

Prompting questions:

- a) Academic benefits?
- b) Technical aspects?
- c) Communication?

d) Planning?

5. Do you think you would prefer virtual over physical? In any case of answers: Why?

**Questions with regards to AD in general:**

6. What is most important to you about the AD service?

Prompting questions

- a) Receiving information or engaging in a discussion?
- b) And do you believe discussions are effectively facilitated?

7. Is it important to you to have a relationship with the people you meet at AD, for example, having the same person return each time?

Prompting questions:

- a) Is this different when it's virtual vs. when AD is physical?

8. Is there anything you missed in the AD to maximize its benefits?

Prompting questions:

- a) Does this apply to both physical and virtual meetings?
- b) Or is there something particularly important for virtual meetings?

**Final question**

9. Is there anything you would like to add? Is there something you are eager to share that you haven't had a chance to say?

**Conclusion**

Thank you for coming today and for sharing.

## Interview Guide 2 – the “naïve” AD participants

### Welcome and information section.

- Introduction to the project
- Information about how the interviews will be performed
- Information about Audio recording
- Information about de-identification of personal-identifying information (what you say here will be transcribed and de-identified so that it is not clear who said what. Audio files will be deleted after our analysis)
- The interviewers’ confidentiality commitment to the AD deliverers
- Introduction of the interviewers
- The role of the moderator

### Collecting participant consent on audio recording

➔ START AUDIO RECORDING

Question: Can you please state your name and confirm your consent to participate in the study as we have described?

➔ END AUDIO RECORDING (this is saved separately from the transcriptions)

➔ START AUDIO RECORDING AGAIN

### Opening question

First, we would like to know how many years of experience you have as a general practitioner. Thank you.

### Questions with regards to the virtual AD meeting/delivery

**NB! Questions not necessarily in the numbered order, this is just for easier reference.**

We understand that you have recently participated in a virtual AD meeting. We are primarily interested in your experience and perceptions of the virtual AD meeting, but also aim to understand how AD can be improved in general.

1. First, what motivated you to participate in the AD meeting?

Prompting questions:

- a) The first time I was invited
- b) Interesting topic
- c) Convenient timing

2. We are interested in understanding how you experienced this and any suggestions you have for improvement, but first: What were your expectations for the AD meeting?

3. Can you tell us about how the AD meeting was planned and how it worked?

Prompting questions:

- a) Was there anything that didn't work as you had hoped? Why?
- b) Was there anything you missed when it was conducted virtually?
- c) Do you prefer AD meetings during working hours or outside of working hours?
- d) How would you prefer to be invited to a AD meeting or to register for one?

4. Let's say you continue with these AD meetings virtually. If you had the opportunity to determine how they should be structured to maximize your benefits, what would you keep, and what would you change?

5. Do you think you would prefer physical over virtual? In any case of answers: Why?

### Questions with regards to AD in general:

6. What is most important to you about the AD service?

Prompting questions

- a) Receiving information or engaging in a discussion?
- b) And do you believe discussions are effectively facilitated?

7. Is it important to you to have a relationship with the people you meet at AD, for example, having the same person return each time?

8. Is there anything you missed in the AD meeting to maximize its benefits?

Prompting questions:

- a) Is there something particularly important for virtual meetings?

**Final question**

9. Is there anything you would like to add? Is there something you are eager to share that you haven't had a chance to say?

**Conclusion**

Thank you for coming today and for sharing.
